# Supplementary material
Source: publisher figshare collection journal article supplement (https://tandf.figshare.com/articles/dataset/_/9777473)
Supplement: Supplementary file 1 [file 1]

Appendix 1. Electronic search of the MEDLINE, EMBASE and Cochrane Database of Systematic Reviews - Publication date from 2008/01/01 to 2017/12/31

a. MEDLINE

|    |                                        |
|----|----------------------------------------|
|    | <b>PAD terms</b>                       |
| 1  | Peripheral Arterial Disease            |
| 2  | Intermittent Claudication              |
| 3  | 1 OR 2                                 |
|    | <b>COPD terms</b>                      |
| 4  | Pulmonary Disease, Chronic Obstructive |
| 5  | Lung Diseases                          |
| 6  | Respiratory Tract Diseases             |
| 7  | 4 OR 5 OR 6                            |
| 8  | 3 AND 7                                |
| 9  | Human                                  |
| 10 | 8 AND 9                                |

PAD, peripheral arterial disease; COPD, chronic obstructive pulmonary disease

b. EMBASE

|    |                                     |
|----|-------------------------------------|
|    | <b>PAD terms</b>                    |
| 1  | peripheral occlusive artery disease |
| 2  | intermittent claudication           |
| 3  | 1 OR 2                              |
|    | <b>COPD terms</b>                   |
| 4  | chronic obstructive lung disease    |
| 5  | lung disease                        |
| 6  | respiratory tract disease           |
| 7  | 4 OR 5 OR 6                         |
| 8  | 3 AND 7                             |
| 9  | Human                               |
| 10 | 8 AND 9                             |

PAD, peripheral arterial disease; COPD, chronic obstructive pulmonary disease

c. Cochrane Database of Systematic Reviews

|   |                                        |
|---|----------------------------------------|
|   | <b>PAD terms</b>                       |
| 1 | Peripheral Arterial Disease            |
| 2 | Intermittent Claudication              |
| 3 | 1 OR 2                                 |
|   | <b>COPD terms</b>                      |
| 4 | Pulmonary Disease, Chronic Obstructive |
| 5 | Lung Diseases                          |
| 6 | Respiratory Tract Diseases             |
| 7 | 4 OR 5 OR 6                            |
| 8 | 3 AND 7                                |

PAD, peripheral arterial disease; COPD, chronic obstructive pulmonary disease
