# Supplementary material
Source: publisher figshare collection journal article supplement (https://tandf.figshare.com/articles/dataset/_/9777473)
Supplement: Supplementary file 2 [file 1]

## Appendix 3. Characteristics of the analyzed studies.

| Author and publication year                           | Castagna O. et al. 2008[1]                                                                                                                                              | Pecci R. et al. 2012[2]                                                                                                                               | Chen W. et al. 2015[3]                                                                                                                                                                                      | Pizarro C. et al. 2016[4]                                                                                                                          | Houben-Wilke S. et al. 2017[5]                                                                                                                                                | Crisafulli E. et al. 2017[6]                                                                                                                                                                                       | Tuleta I. et al. 2017[7]                                                                                                                                                       |
|-------------------------------------------------------|-------------------------------------------------------------------------------------------------------------------------------------------------------------------------|-------------------------------------------------------------------------------------------------------------------------------------------------------|-------------------------------------------------------------------------------------------------------------------------------------------------------------------------------------------------------------|----------------------------------------------------------------------------------------------------------------------------------------------------|-------------------------------------------------------------------------------------------------------------------------------------------------------------------------------|--------------------------------------------------------------------------------------------------------------------------------------------------------------------------------------------------------------------|--------------------------------------------------------------------------------------------------------------------------------------------------------------------------------|
| <b>Publication title</b>                              | Peripheral arterial disease: an underestimated aetiology of exercise intolerance in chronic obstructive pulmonary disease patients                                      | Peripheral arterial disease in patients with chronic obstructive pulmonary disease                                                                    | Is asymptomatic peripheral arterial disease associated with walking endurance in patients with COPD?                                                                                                        | Lower extremity and carotid artery disease in COPD                                                                                                 | Peripheral Artery Disease and Its Clinical Relevance in Patients with Chronic Obstructive Pulmonary Disease in the COPD and Systemic Consequences–Comorbidities Network Study | Asymptomatic peripheral artery disease can limit maximal exercise capacity in chronic obstructive pulmonary disease patients regardless of airflow obstruction and lung hyperinflation                             | High prevalence of COPD in atherosclerosis patients                                                                                                                            |
| <b>Publication type</b>                               | article                                                                                                                                                                 | article                                                                                                                                               | article                                                                                                                                                                                                     | article                                                                                                                                            | article                                                                                                                                                                       | article                                                                                                                                                                                                            | article                                                                                                                                                                        |
| <b>Journal title</b>                                  | European Journal of Cardiovascular Prevention and Rehabilitation                                                                                                        | International Angiology                                                                                                                               | International Journal of COPD                                                                                                                                                                               | European Respiratory Journal Open research                                                                                                         | American Journal of Respiratory and Critical Care Medicine                                                                                                                    | European Journal of Preventive Cardiology                                                                                                                                                                          | International Journal of COPD                                                                                                                                                  |
| <b>Study type</b>                                     | cross sectional study                                                                                                                                                   | cross sectional study                                                                                                                                 | cross sectional study                                                                                                                                                                                       | cross sectional study                                                                                                                              | cross sectional study                                                                                                                                                         | cross sectional study                                                                                                                                                                                              | cross sectional study                                                                                                                                                          |
| <b>Study aims</b>                                     | - to assess the prevalence of peripheral arterial disease and its implications for exercise limitation in COPD patients                                                 | - to determine the prevalence of PAD in a population of patients with COPD<br>- to investigate the relationship between PAD and lung disease severity | - to investigate the association between asymptomatic PAD and walking endurance, measured by the 6MWT in COPD patients<br>- to analyze which factors were associated with the distance achieved on the 6MWT | - to determine the linkage between PAD and COPD                                                                                                    | - to assess the prevalence of PAD in COPD compared with distinct control groups<br>- to study the association between PAD and functional capacity as well as health status    | - to evaluate in COPD patients the impact of asymptomatic/silent PAD on maximal exercise capacity<br>- to search for predictors of PAD                                                                             | - to determine the prevalence of COPD in patients with cerebral and/or peripheral artery disease<br>- to assess factors associated with the presence of COPD                   |
| <b>Inclusion criteria</b>                             | - COPD patients from Toulon's hospital clinically stable with the absence of respiratory exacerbation within 2 months before the study<br>- healthy control individuals | - patients with COPD                                                                                                                                  | - COPD patients who volunteered to undergo ABI measurements and the 6MWT enrolled in the CMPICO study[8]                                                                                                    | - patients aged ≥18 years receiving treatment for spirometrically and clinically confirmed COPD<br>- nonCOPD control smokers                       | - patients aged ≥40 years having a diagnosis of COPD or symptoms of chronic bronchitis                                                                                        | - adult COPD patients having a former or current smoking history of at least 10 pack-years and in a cardio-respiratory stable condition for at least six weeks previous the enrolment                              | - confirmation of atherosclerotic cerebral and/or PAD in duplex sonography and the ability of the patient to conduct properly breathing maneuvers during body plethysmography. |
| <b>Exclusion criteria</b>                             | - taking medications that were prone to interfere with the tests                                                                                                        | NR                                                                                                                                                    | - obvious symptoms of PAD<br>- not current or former smokers with at least a 10-pack-year history<br>- history of bronchial asthma and other structural lung diseases                                       | - previously diagnosed LEAD and carotid artery disease (including cerebrovascular disorders)<br>- acute exacerbated COPD at the time of evaluation | - patients with missing ABI or lung function data<br>- unclassified patients<br>- patients with alpha1 deficiency                                                             | - concomitant respiratory disease other than COPD, such as asthma or bronchiectasis<br>- chronic respiratory failure needing long-term oxygen therapy<br>- any signs or symptoms potentially attributable to a PAD | - restrictive pattern defined as total lung capacity < 80% of a predicted value                                                                                                |
| <b>Geographical location</b>                          | France                                                                                                                                                                  | Spain                                                                                                                                                 | Taiwan                                                                                                                                                                                                      | Germany                                                                                                                                            | Germany                                                                                                                                                                       | Italy                                                                                                                                                                                                              | Germany                                                                                                                                                                        |
| <b>Recruitment population</b>                         | COPD patients hospitalized in Toulon's hospital                                                                                                                         | COPD patients admitted consecutively in the Internal Medicine Department                                                                              | COPD patients at the outpatient department of the Division of Pulmonary and Critical Care Medicine                                                                                                          | patients receiving treatment at the Department of Pneumology and non COPD smokers                                                                  | patients referred to the study by pulmonologists and general practitioners                                                                                                    | COPD out-patients of Lung Function Unit                                                                                                                                                                            | hospitalized patients and out-patients with confirmed atherosclerotic cerebral and/or peripheral artery disease                                                                |
| <b>Recruited population size</b>                      | 224                                                                                                                                                                     | 246                                                                                                                                                   | 200                                                                                                                                                                                                         | 129                                                                                                                                                | 2088                                                                                                                                                                          | 47                                                                                                                                                                                                                 | 166                                                                                                                                                                            |
| <b>PAD population size</b>                            | 123                                                                                                                                                                     | 84                                                                                                                                                    | 17                                                                                                                                                                                                          | 86                                                                                                                                                 | 184                                                                                                                                                                           | 24                                                                                                                                                                                                                 | 125                                                                                                                                                                            |
| <b>COPD population size</b>                           | 151                                                                                                                                                                     | 246                                                                                                                                                   | 200                                                                                                                                                                                                         | 107                                                                                                                                                | 2088                                                                                                                                                                          | 47                                                                                                                                                                                                                 | 36*                                                                                                                                                                            |
| <b>PAD diagnostic criteria</b>                        | ABI                                                                                                                                                                     | ABI                                                                                                                                                   | ABI                                                                                                                                                                                                         | ABI                                                                                                                                                | ABI                                                                                                                                                                           | ABI                                                                                                                                                                                                                | ABI                                                                                                                                                                            |
| <b>COPD diagnostic criteria</b>                       | GOLD                                                                                                                                                                    | GOLD                                                                                                                                                  | GOLD                                                                                                                                                                                                        | GOLD                                                                                                                                               | GOLD                                                                                                                                                                          | GOLD                                                                                                                                                                                                               | GOLD                                                                                                                                                                           |
| <b>PAD stage</b>                                      | NA                                                                                                                                                                      | NA                                                                                                                                                    | NA                                                                                                                                                                                                          | NA                                                                                                                                                 | NA                                                                                                                                                                            | NA                                                                                                                                                                                                                 | F I 72.0%<br>F IIa 10.4%<br>F IIb 15.2%<br>F III 0.8%<br>F IV 1.6%                                                                                                             |
| <b>COPD stage</b>                                     | NR                                                                                                                                                                      | GOLD<br>I 2.4%<br>II 48.0%<br>III 41.1%<br>IV 8.5%                                                                                                    | GOLD<br>I 14%<br>II 48%<br>III 31%<br>IV 7%                                                                                                                                                                 | GOLD<br>A 5.6%<br>B 48.6%<br>C 3.7%<br>D 42.1%                                                                                                     | GOLD<br>I 9.4%<br>II 42.5%<br>III 37.5%<br>IV 10.5%                                                                                                                           | NR                                                                                                                                                                                                                 | NA                                                                                                                                                                             |
| <b>Age of patients in PAD group [years±SD]</b>        | NR                                                                                                                                                                      | 71.9±10.6                                                                                                                                             | 71.9±9                                                                                                                                                                                                      | NR                                                                                                                                                 | 68.5±7                                                                                                                                                                        | 68.7±8.4                                                                                                                                                                                                           | NR                                                                                                                                                                             |
| <b>Age of patients in COPD group [years±SD]</b>       | 67±3.1                                                                                                                                                                  | 70.2±11.0                                                                                                                                             | 70.9±8.9                                                                                                                                                                                                    | 64.6±10.4                                                                                                                                          | 65.3±8.2                                                                                                                                                                      | 68.3±7.1                                                                                                                                                                                                           | 72.4±8.6*                                                                                                                                                                      |
| <b>Number of PAD patients among COPD patients (%)</b> | 123 (81.5)                                                                                                                                                              | 84 (34.1)                                                                                                                                             | 17 (8.5)                                                                                                                                                                                                    | 86 (80.4)                                                                                                                                          | 184 (8.8)                                                                                                                                                                     | 24 (51.1)                                                                                                                                                                                                          | NA                                                                                                                                                                             |
| <b>Number of COPD patients among PAD patients</b>     | NA                                                                                                                                                                      | NA                                                                                                                                                    | NA                                                                                                                                                                                                          | NA                                                                                                                                                 | NA                                                                                                                                                                            | NA                                                                                                                                                                                                                 | 34 (27.2)                                                                                                                                                                      |
| <b>Number of smoking patients (%)</b>                 | -- COPD group:<br>- current or former 151 (100)<br>-- PAD group<br>- current or former - NR                                                                             | -- COPD group:<br>- current 57 (23.2)<br>- former 134 (54.5)<br>-- PAD group:<br>- current 19 (22.6)<br>- former 58 (69.0)                            | -- COPD group:<br>- current 94 (47.0)<br>- former 106 (53.0)<br>-- PAD group:<br>- current 8 (47.1)<br>- former 9 (52.9)                                                                                    | -- COPD group:<br>- current 22 (20.6)<br>- former 80 (74.8)<br>-- PAD group:<br>- current - NR<br>- former - NR                                    | -- COPD group:<br>- current 550 (26.3)<br>- former 1424 (68.2)<br>-- PAD group:<br>- current 64 (34.8)<br>- former 116 (63.0)                                                 | -- COPD group:<br>- current 12 (25.5)<br>- former 35 (74.5)<br>-- PAD group:<br>- current 8 (33.3)<br>- former 16 (66.7)                                                                                           | -- COPD group*:<br>- current 3 (8.3)<br>- former 23 (63.9)<br>-- PAD group:<br>- current - NR<br>- former - NR                                                                 |
| <b>Remarks</b>                                        | non-smokers excluded                                                                                                                                                    |                                                                                                                                                       | symptomatic PAD patients and not current or former smokers with at least a 10-pack-year history excluded                                                                                                    |                                                                                                                                                    |                                                                                                                                                                               | symptomatic PAD patients and non-smokers excluded                                                                                                                                                                  | patients with total lung capacity < 80% of a predicted value excluded                                                                                                          |

COPD, chronic obstructive pulmonary disease; PAD, peripheral arterial disease; 6MWT, six minute walk test; ABI, ankle-brachial index; CMPICO, Case Management Program and Integrated Care for Patients with COPD; GOLD, global initiative for chronic obstructive lung disease<sup>8</sup>; GOLD I-IV or A-D, global initiative for chronic obstructive lung disease classification<sup>8</sup>; NA, not applicable; NR, not reported; F, Fontaine classification<sup>9</sup>; \* in the group of patients with cerebral and/or peripheral artery disease

### **Appendix 3. references**

- [1] Castagna O, Boussuges A, Nussbaum E, et al. Peripheral arterial disease: an underestimated aetiology of exercise intolerance in chronic obstructive pulmonary disease patients. *Eur. J. Cardiovasc. Prev. Rehabil.* 2008;15:270–277.
- [2] Pecci R, De La Fuente Aguado J, Sanjurjo Rivo AB, et al. Peripheral arterial disease in patients with chronic obstructive pulmonary disease. *Int. Angiol.* 2012;31:444–453.
- [3] Chen W, Lin M-S, Sun K-S, et al. Is asymptomatic peripheral arterial disease associated with walking endurance in patients with COPD? *Int. J. Chron. Obstruct. Pulmon. Dis.* 2015;10:1487.
- [4] Pizarro C, Linnhoff F, van Essen F, et al. Lower extremity and carotid artery disease in COPD. *ERJ open Res.* 2016;2.
- [5] Houben-Wilke S, Jörres RA, Bals R, et al. Peripheral Artery Disease and Its Clinical Relevance in Patients with Chronic Obstructive Pulmonary Disease in the COPD and Systemic Consequences–Comorbidities Network Study. *Am. J. Respir. Crit. Care Med.* 2017;195:189–197.
- [6] Crisafulli E, Scelfo C, Tzani P, et al. Asymptomatic peripheral artery disease can limit maximal exercise capacity in chronic obstructive pulmonary disease patients regardless of airflow obstruction and lung hyperinflation. *Eur. J. Prev. Cardiol.* 2017;24:990–999.
- [7] Tuleta I, Farrag T, Busse L, et al. High prevalence of COPD in atherosclerosis patients. *Int. J. Chron. Obstruct. Pulmon. Dis.* 2017;12:3047–3053.
- [8] Lin M-S, Hsu K-Y, Chen Y-J, et al. Prevalence and risk factors of asymptomatic peripheral arterial disease in patients with COPD in Taiwan. *PLoS One.* 2013;8:e64714.
