# Supplementary material
Source: publisher figshare collection journal article supplement (https://tandf.figshare.com/articles/dataset/_/9777473)
Supplement: Supplementary file 3 [file 1]

## Appendix 2. Risk of bias analysis

A. Risk of bias summary: review of authors' judgments about each risk of bias question for each study included in the project.

|                                                                      | Castagna O.<br>et al. 2008[1]                                                        | Pecci R. et<br>al. 2012[2]                                                            | Chen W. et<br>al. 2015[3]                                                             | Pizarro C. et<br>al. 2016[4]                                                          | Houben-Wilke<br>S. et al. 2017[5]                                                     | Crisafulli E. et<br>al. 2017[6]                                                       | Tuleta I. et<br>al. 2017[7]                                                           |
|----------------------------------------------------------------------|--------------------------------------------------------------------------------------|---------------------------------------------------------------------------------------|---------------------------------------------------------------------------------------|---------------------------------------------------------------------------------------|---------------------------------------------------------------------------------------|---------------------------------------------------------------------------------------|---------------------------------------------------------------------------------------|
| Were the criteria for inclusion in the sample clearly defined?       |    |    |    |    |    |    |    |
| Were the study subjects and the setting described in detail?         |    |    |    |    |    |    |    |
| Was the exposure measured in a valid and reliable way?               |    |    |    |    |    |    |    |
| Were objective, standard criteria used for measurement of condition? |    |    |    |    |    |    |    |
| Were confounding factors identified?                                 |    |    |    |    |    |    |    |
| Were strategies to deal with confounding factors stated?             |  |  |  |  |  | NA                                                                                    |  |
| Were the outcomes measured in a valid and reliable way?              |  |  |  |  |  |  |  |
| Was appropriate statistical analysis used?                           |  |  |  |  |  |  |  |

NA, not applicable, because the differences in the confounding parameters between compared groups were statistically insignificant.

B. Risk of bias graph: review of authors' judgments regarding each risk of bias question presented as percentages across all studies included in the project

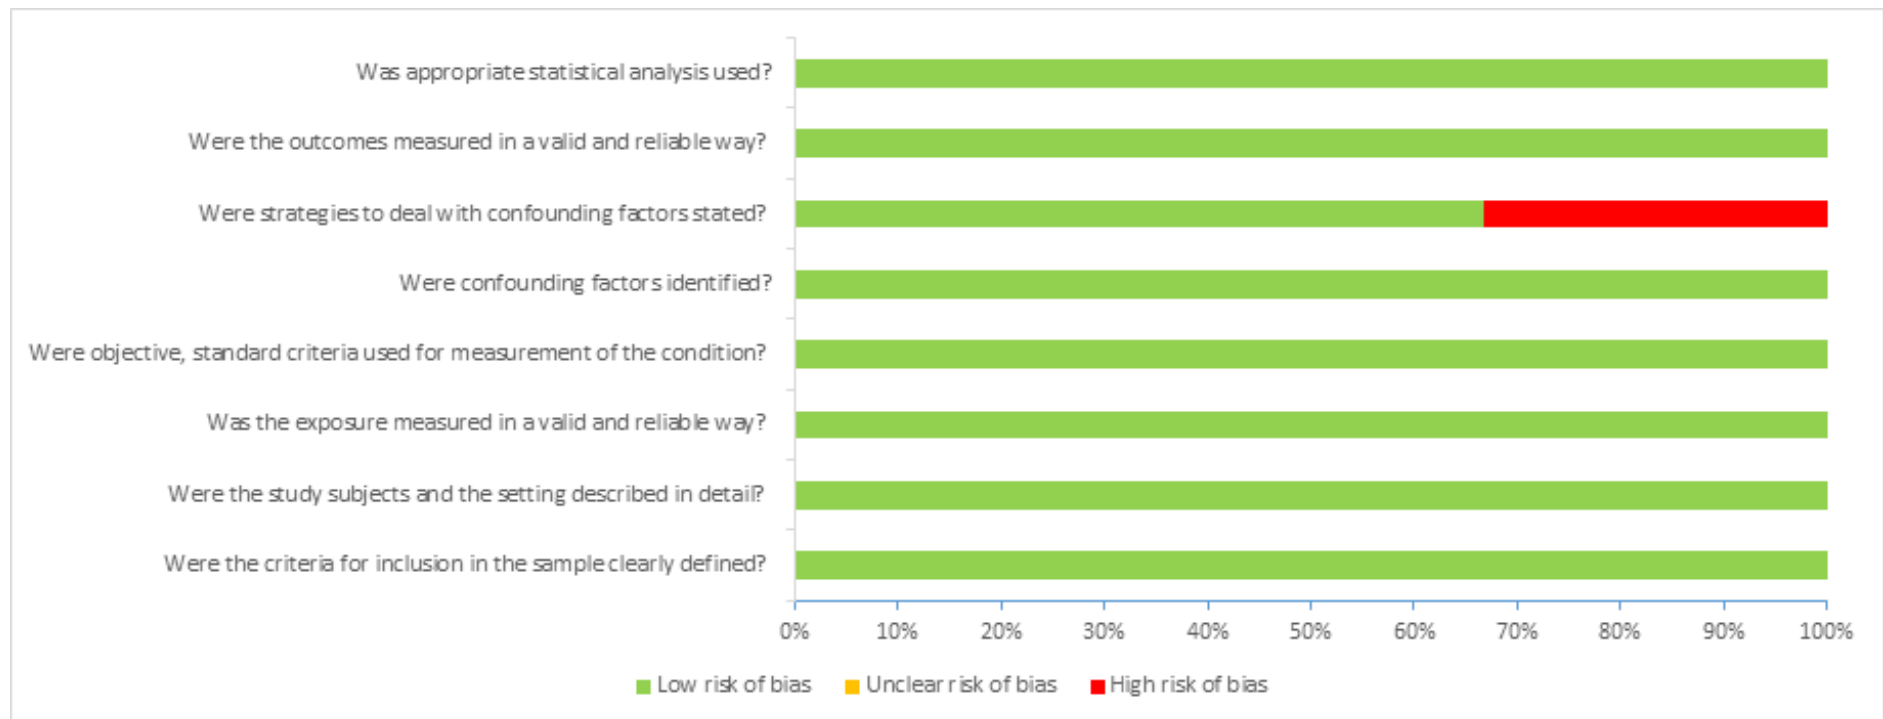

## **Appendix 2. references**

- [1] Castagna O, Boussuges A, Nussbaum E, et al. Peripheral arterial disease: an underestimated aetiology of exercise intolerance in chronic obstructive pulmonary disease patients. *Eur. J. Cardiovasc. Prev. Rehabil.* 2008;15:270–277.
- [2] Pecci R, De La Fuente Aguado J, Sanjurjo Rivo AB, et al. Peripheral arterial disease in patients with chronic obstructive pulmonary disease. *Int. Angiol.* 2012;31:444–453.
- [3] Chen W, Lin M-S, Sun K-S, et al. Is asymptomatic peripheral arterial disease associated with walking endurance in patients with COPD? *Int. J. Chron. Obstruct. Pulmon. Dis.* 2015;10:1487.
- [4] Pizarro C, Linnhoff F, van Essen F, et al. Lower extremity and carotid artery disease in COPD. *ERJ Open Res.* 2016;2:00037–02016.
- [5] Houben-Wilke S, Jörres RA, Bals R, et al. Peripheral Artery Disease and Its Clinical Relevance in Patients with Chronic Obstructive Pulmonary Disease in the COPD and Systemic Consequences–Comorbidities Network Study. *Am. J. Respir. Crit. Care Med.* 2017;195:189–197.
- [6] Crisafulli E, Scelfo C, Tzani P, et al. Asymptomatic peripheral artery disease can limit maximal exercise capacity in chronic obstructive pulmonary disease patients regardless of airflow obstruction and lung hyperinflation. *Eur. J. Prev. Cardiol.* 2017;24:990–999.
- [7] Tuleta I, Farrag T, Busse L, et al. High prevalence of COPD in atherosclerosis patients. *Int. J. Chron. Obstruct. Pulmon. Dis.* 2017;12:3047–3053.
